# Supplementary material for: Appropriate Use Criteria for Fluoroscopically Guided Diagnostic and Therapeutic Sacroiliac Interventions: Results from the Spine Intervention Society Convened Multispecialty Collaborative
Source: Oxford University Press journal article supplement (doi:10.1093/pm/pnx253), 2017-09-20
Supplement: pnx253_supp-file2.docx [file pnx253_supp-file2.docx]

**Supplementary Data File 2**

**Panel Member Conflicts of Interest (2012-2014)**

**Unless otherwise noted, members represent the Spine Intervention Society*

***Evidence Panel Members***

**Anil Sharma, MD, Chair:** none

**Shihab Ahmed, MD:** NIH-funded research

**Thiru Annaswamy, MD (AAPMR):** none

**Jamie Baisden, MD (NASS):** none

**Asokumar Buvanendran, MD (ASA):** equity owner, Nimbus Spine LLC; ASRA Board of Directors; consultant, Medtronic; journal peer reviewer; research/grant support from NIH, APSR, and Pfizer

**Michael DePalma, MD:** 4K unexercised stock options from previously terminated consulting agreement; President, Chairman, Director of Research, Virginia Spine Research Ins., Inc; co-investigator for Spinal Restoration, Mesoblast, and St Jude Medical

**Andrew Engel, MD:** minimal Medtronic and Boston Scientific stock in a family investment fund; completed utilization reviews in 2009-2011

**Wellington Hsu, MD (AAOS):** consultant/speaker to Stryker, Pioneer, Medtronic, Terumo, Zimmer, Lifenet, AONA; research/grant support from AO Spine, OREF

**Wade King, MMed:** none

**D. Scott Kreiner, MD:** $1500 for attending a consultant’s meeting on viscosupplementation for knee osteoarthritis

**Tim Lamer, MD (AAPM):** Board of Directors, American Academy of Pain Medicine

**Devi Nampiaparampil, MD:** expert witness for Kline Specter, one time; ProStrakan Medical Research Advisory Panel, June 2011, one time; employee for the Department of Veterans Affairs as the head of interventional pain management

**Nileshkumar Patel, MD:** consultant agreement Kimberly Clark; previous grant support in 2009

**Jeffrey Peterson, MD (ACR):** none

**Jeffrey Summers, MD:** none

***Rating Panel Members***

**Ray Baker, MD:** stock ownership in Relievant MedSystems, Nocimed, Laurimed; Medical Director of Evergreen Health Spine and Musculoskeletal Program; board member, Collaborative Spine Research Foundation; Relievant MedSystems - train and proctor physicians on technique at daily consultant rate; Advisory Board for SpineHealth.com

**Asokumar Buvanendran, MD (ASA):** equity owner, Nimbus Spine LLC; ASRA Board of Directors; consultant, Medtronic; journal peer reviewer; research/grant support from NIH, APSR, and Pfizer

**Srinivas Chiravuri, MD:** member of ASRA, ASA, SAAA (involved in fellow education as Fellowship Director); patent pending for dual chamber intrathecal drug delivery system; research support, University of Michigan

**Eduardo Fraifeld, MD (AAPM):** Medical Director, Southside Pain Solutions; independent legal consultation as expert medical witness; author of chapter in AAPM textbook on intercostal nerve blocks

**Mary Jesse, MD (ACR):** none

**David J. Kennedy, MD:** expert witness on paralysis after epidural injections; RS Medical Advisory Committee member

**Milton Landers, DO, PhD:** none

**John MacVicar, MD:** none

**Heidi Prather, DO (NASS):** none

**Gwendolyn Sowa, MD (AAPMR):** speaking to Cytonics on own research; NIH, NIDRR, American Geriatrics Society research grant support; up to date royalties for chapter on low back pain

**Claire Tibiletti, MD:** 4.9% ownership (approx) of Texas Spine and Joint Hospital, Tyler, TX

**William C. Watters, III, MD (AAOS):** expert witness services in defense legal cases of malpractice and personal injury; beneficiary of copyright payments for self-published books; royalty arrangement with Stryker Corp for co-developed cervical fixation plate
